# Supplementary material for: Significantly improved de/rehydrogenation properties of lithium borohydride modified with hexagonal boron nitride
Source: Royal Society of Chemistry journal article supplement (doi:10.1039/c5ra05438a), 2015-01-01
Supplement: c5ra05438a1.pdf [file c5ra05438a1.pdf]

## Significantly improved de/rehydrogenation properties of lithium borohydride modified with hexagonal boron nitride

Guoping Tu, Xuezhang Xiao, Teng Qin, Yiqun Jiang, Shouquan Li, Hongwei Ge and Lixin Chen\*

### Electronic supplementary information

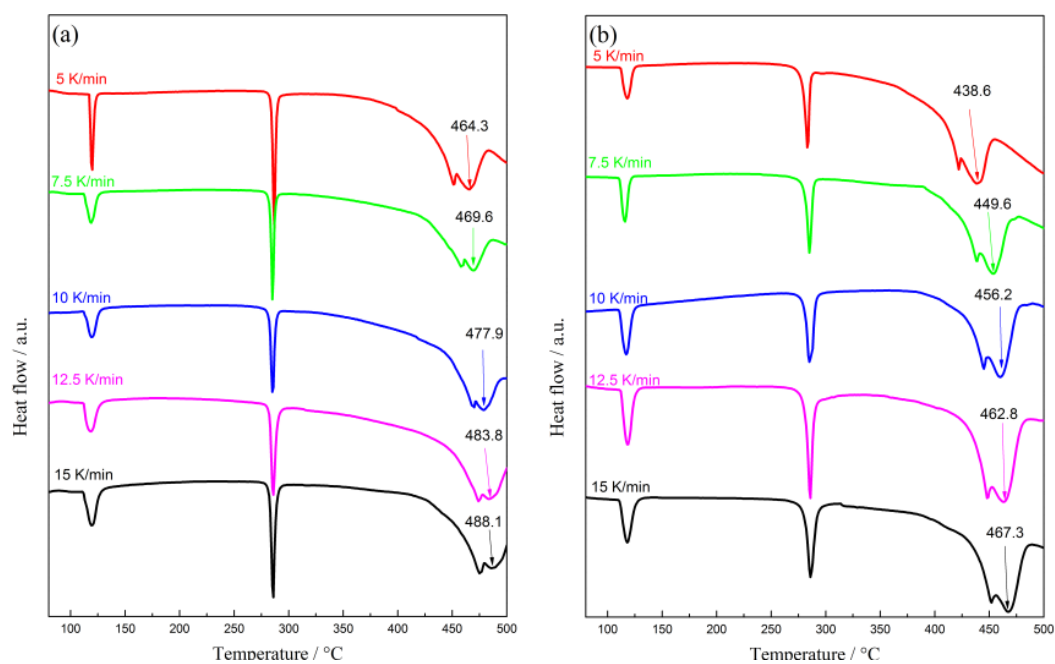

Fig.S1 DSC profiles of (a) ball milled LiBH<sub>4</sub> and (b) 30 mol% h-BN doped LiBH<sub>4</sub> samples at different heating rate.

\* State Key Laboratory of Silicon Materials, Key Laboratory of Advanced Materials and Applications for Batteries of Zhejiang Province, School of Materials Science and Engineering, Zhejiang University, Hangzhou 310027, China. E-mail address: lxchen@zju.edu.cn (L.X. Chen). Tel./fax: +86 571 8795 1152.

† Electronic Supplementary Information (ESI) available: DSC curves with different rates and Isothermal dehydrogenation curves of the LiBH<sub>4</sub> doped with graphite. See DOI: 10.1039/x0xx00000x

As both h-BN and graphite are sheet structure, the  $\text{LiBH}_4$  doped with the same weight of graphite as the weight of h-BN of the 30 mol% h-BN doped  $\text{LiBH}_4$  sample was prepared in the same conditions. For comparison, the isothermal dehydrogenation curves of the graphite doped  $\text{LiBH}_4$  sample was displayed in the Fig. S2. The results shows that the 30 mol% h-BN doped  $\text{LiBH}_4$  sample could release 12.6 wt% within 2 h, while the graphite doped  $\text{LiBH}_4$  sample only release 4.6 wt% hydrogen, much better than the graphite doped  $\text{LiBH}_4$  sample. The most difference between h-BN and graphite is lone pair electrons of nitrogen of h-BN, and  $\text{LiBH}_4$  is an “electron-deficient” molecule, which possess fewer electrons than those apparently required to fill all the bonding orbital. So it is highly possible that the lone pair electrons of nitrogen atom on the h-BN surface may induce destabilization of  $\text{LiBH}_4$  by the lone pair electrons complex with “electron-deficient” molecule  $\text{LiBH}_4$ .

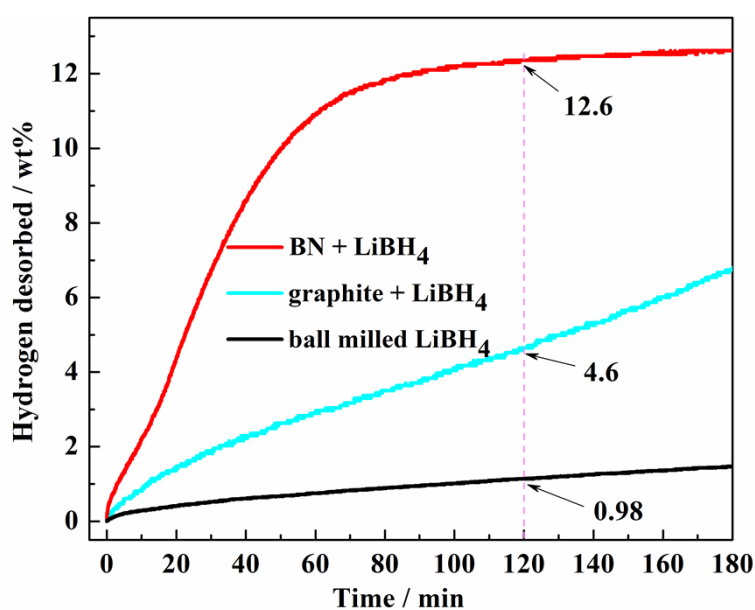

Fig. S2 the isothermal dehydrogenation curves of the ball milled  $\text{LiBH}_4$ , 30 mol% h-BN doped  $\text{LiBH}_4$  and graphite doped  $\text{LiBH}_4$  samples. Special notes: the weight of graphite additive of the graphite doped  $\text{LiBH}_4$  sample is equal to the weight of h-BN of the 30 mol% h-BN doped  $\text{LiBH}_4$  sample, and was prepared in the same conditions.
